# Supplementary material
Source: MDPI journal article supplement (https://www.mdpi.com/2673-5636/4/1/8)
Supplement: s1 [file s1]

**Table S1.** Toy List

| Toy Names and Descriptions                                                               |
|------------------------------------------------------------------------------------------|
| Linus Blanket (black felt, never removed from pool)                                      |
| Buoys:                                                                                   |
| Buoy Combo (two white buoys tied with rope)                                              |
| Blue Buoy (medium blue buoy)                                                             |
| Fender (large dark blue buoy)                                                            |
| Orange buoy (orange buoy with small rope, may have bottle or ring attached))             |
| Cones:                                                                                   |
| Cone (orange traffic cone)                                                               |
| Cone+Small Ball (cone with small ball stuffed inside to make cone float)                 |
| Cone+Wubba (cone with wubba stuffed inside or pulled through the top to make cone float) |
| Purple Cone (small plastic purple cone)                                                  |
| Balls:                                                                                   |
| Kickball (red kickball)                                                                  |
| Butterfly Ball (butterfly patterned kickball)                                            |
| Jollyfelt (Jolly ball with felt tied)                                                    |
| Small Ball (small cloth basketball)                                                      |
| Basketball (red basketball)                                                              |
| Soccer Ball (purple and blue cloth soccer ball)                                          |
| Sputnik (green feeder ball with felt coming out and a buoy inside)                       |
| Carwash (large piece of felt connected to floating PVC pipe)                             |
| Noodle (pool noodle wrapped in duct tape)                                                |
| Large Puzzle Piece (large floating foam in the shape of a puzzle piece)                  |
| Small Puzzle Piece (small floating foam in the shape of a puzzle piece)                  |
| Wubba (green neoprene Kong brand water toy)                                              |
| Bucket (small blue sand castle bucket)                                                   |
| Bowl (black sinking feed bowl)                                                           |
| Dive Ring                                                                                |
| Plate (red plastic plate)                                                                |
| Bottle (green plastic bottle)                                                            |
| Water Hose (hose placed intentionally by trainer for play)                               |
| Hula Hoop (red hula hoop)                                                                |
| Blue Mat (big floating pool float)                                                       |
| PVC Square (large weighted PVC square frame)                                             |
| Baton (small PVC stick)                                                                  |
| Ring rope (small white buoy bead tied with rope to 3 dive rings)                         |
| Elephant (elephant watering can)                                                         |

Gray bin (gray plastic storage bin)

Round Board (starboard round toy, used as 'surfboard' by some dolphins)

Frisbee (disk toy)

Brush (blue brush)

Duck Jug (5 gallon water bottle filled about  $\frac{3}{4}$  full with water, with plastic rubber ducks sealed inside)

---
